# Supplementary material for: Bioinspired stimuli-responsive multilayer film made of silk–titanate nanocomposites
Source: Royal Society of Chemistry journal article supplement (doi:10.1039/c7tc00149e), 2017-01-01
Supplement: c7tc00149e1.pdf [file c7tc00149e1.pdf]

## **Electronic Supplementary Information**

### **Bio inspired stimuli-responsive multilayer film made of silk-titanates nanocomposite**

Elena Colusso<sup>a</sup>, Giovanni Perotto<sup>b</sup>, Yu Wang<sup>c</sup>, Marco Sturaro<sup>a</sup>, Fiorenzo Omenetto<sup>c</sup>, Alessandro Martucci<sup>a\*</sup>

<sup>a</sup> Università di Padova, Dipartimento di Ingegneria Industriale, Via Marzolo, 9, 35131 Padova, Italy

<sup>b</sup> Smart Materials, Istituto Italiano di Tecnologia (IIT), via Morego 30, 16163 Genova, Italy

<sup>c</sup> Department of Biomedical Engineering and Department of Physics, Tufts University, 4 Colby St., Medford, MA 02155, USA

**Table S1:** Effect of methanol annealing on the thickness and the refractive index of the film (at  $\lambda=500$  nm) deposited on silicon substrate. The values reported are obtained from spectroscopic ellipsometry by fitting the experimental data with a Cauchy dispersion equation. Each value is an average over 5 samples.

|                         | <b>Rsilk</b>        |                       |                      | <b>HRIsilk</b>      |                       |                      |
|-------------------------|---------------------|-----------------------|----------------------|---------------------|-----------------------|----------------------|
|                         | <i>As deposited</i> | <i>MeOH annealing</i> | <i>Variation (%)</i> | <i>As deposited</i> | <i>MeOH annealing</i> | <i>Variation (%)</i> |
| <b>Thickness (nm)</b>   | 82 $\pm$ 2          | 80 $\pm$ 2            | -2.5                 | 93 $\pm$ 2          | 42 $\pm$ 5            | -55                  |
| <b>Refractive index</b> | 1.54                | 1.56                  | 1.3                  | 1.62                | 1.82                  | 12.3                 |

**Figure S1:** AFM micrograph of Rsilk film (A) and HRIsilk film (B) deposited on Si wafer after methanol treatment.

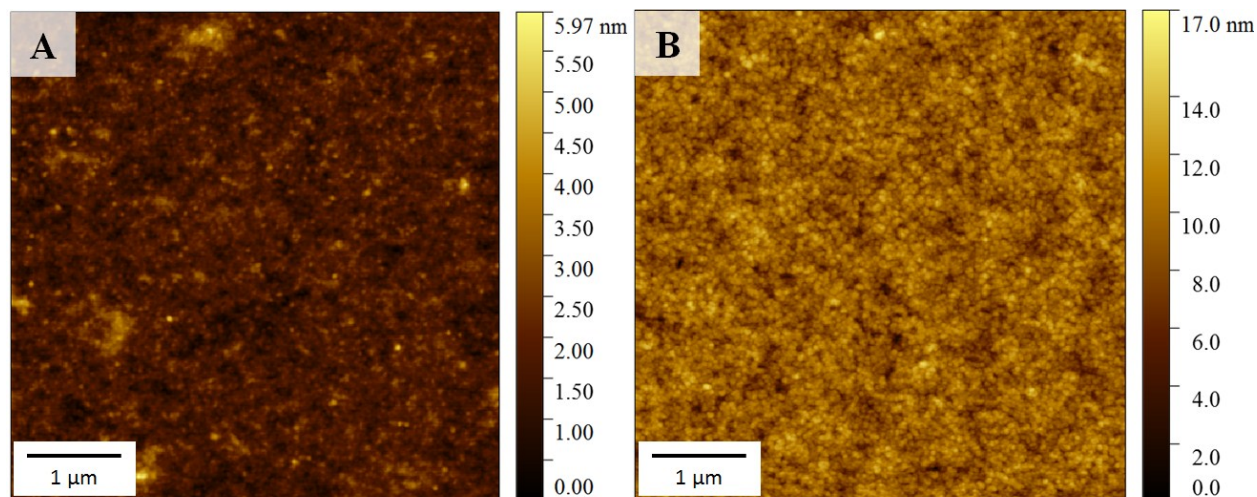

**Table S2:** Roughness average (Ra) and root-mean-square roughness (rms) of Rsilk film. The values reported are calculated on profile extracted from a 5x5 $\mu$ m AFM images (Figure S2).

| Profile | Ra [nm] | rms [nm] |
|---------|---------|----------|
| 1       | 0.381   | 0.488    |
| 2       | 0.344   | 0.435    |
| 3       | 0.447   | 0.549    |
| 4       | 0.395   | 0.486    |
| 5       | 0.316   | 0.396    |
| 6       | 0.399   | 0.495    |
| 7       | 0.415   | 0.515    |
| 8       | 0.297   | 0.375    |
| 9       | 0.443   | 0.565    |

**Figure S2:** AFM image of Rilk film with the profiles corresponded to the roughness values reported in Table S2.

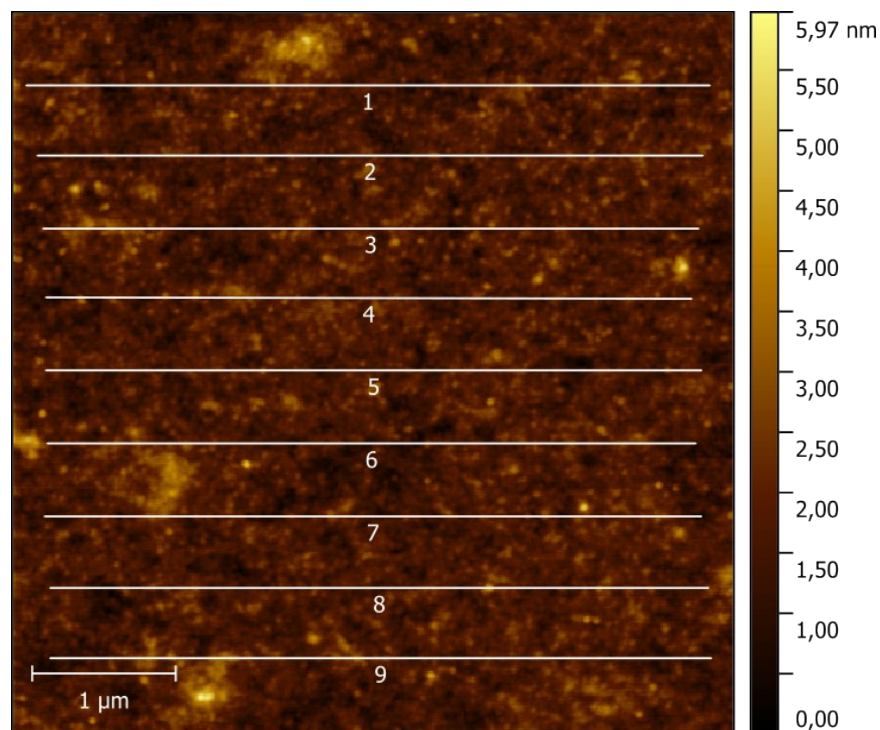

**Table S3:** Roughness average (Ra) and root-mean-square roughness (rms) of HRI silk film. The values reported are calculated on profile extracted from a 5x5 $\mu$ m AFM images (Figure S3).

| Profile | Ra [nm] | rms [nm] |
|---------|---------|----------|
| 1       | 1.501   | 1.891    |
| 2       | 1.012   | 1.319    |
| 3       | 1.179   | 1.505    |
| 4       | 1.075   | 1.370    |
| 5       | 1.156   | 1.443    |
| 6       | 1.222   | 1.558    |
| 7       | 1.141   | 1.462    |
| 8       | 1.079   | 1.354    |
| 9       | 1.215   | 1.535    |

**Figure S3:** AFM image of HRI silk film with the profiles corresponded to the roughness values reported in Table S3.

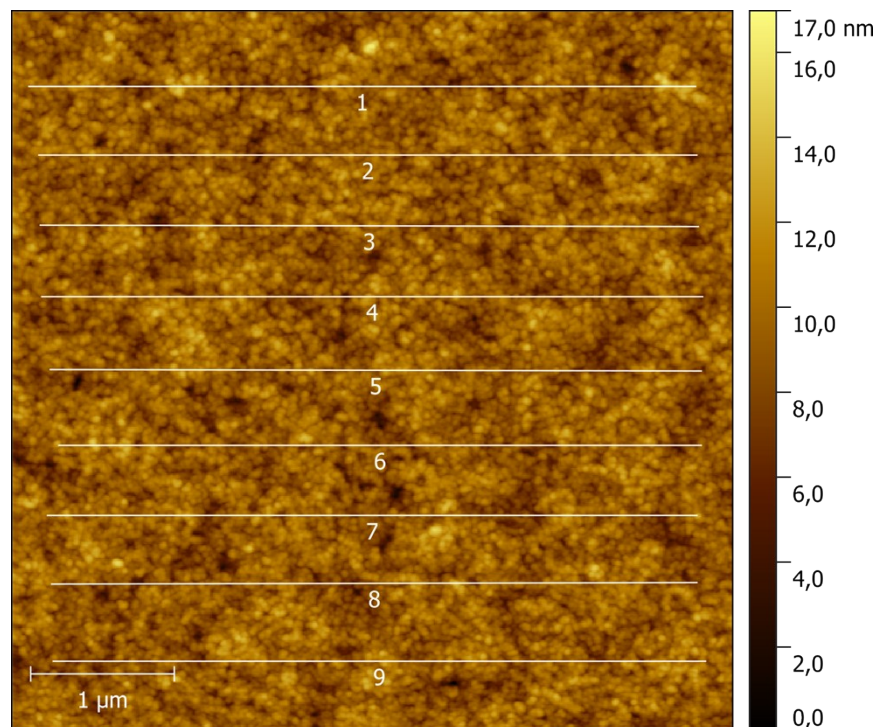

**Figure S4:** Transmittance spectra of multilayers structure for 1, 2, 3 and 4 couples of Rsilk and HRIsilk layers.

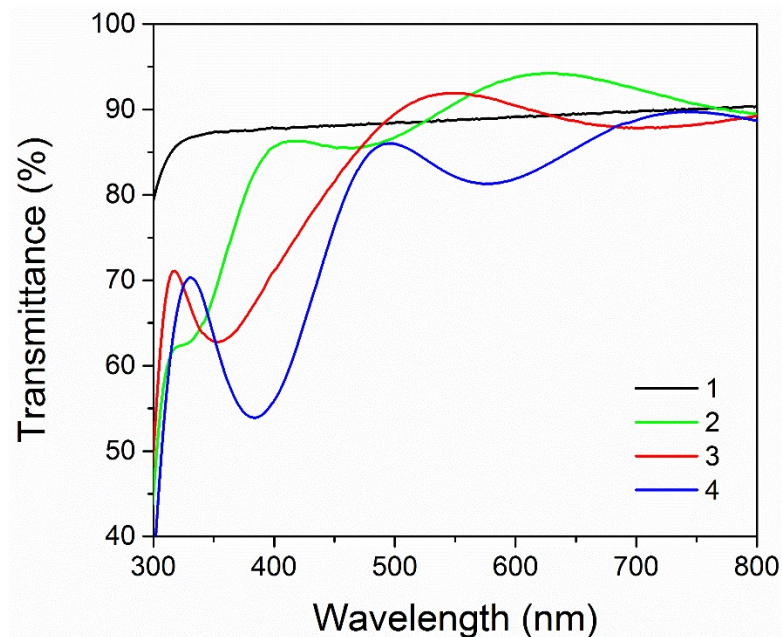

**Table S4:** Thickness and refractive index of Rsilk and HRIsilk films of the best fitting of experimental transmittance spectrum of the multilayer, obtained through simulation.

|                                    | <b>Rsilk</b> | <b>HRIsilk</b> |
|------------------------------------|--------------|----------------|
| <b>Thickness (nm)</b>              | 80           | 39             |
| <b>Refractive index<br/>@500nm</b> | 1.56         | 1.80           |

**Table S5:** Thickness and refractive index of Rsilk and HRIsilk films of the best fitting of experimental data for different humidity conditions: 10% RH and 80% RH.

|                                 | <b>Rsilk</b> |              |                          | <b>HRIsilk</b> |              |                          |
|---------------------------------|--------------|--------------|--------------------------|----------------|--------------|--------------------------|
|                                 | <i>10%RH</i> | <i>80%RH</i> | <i>Difference</i><br>(%) | <i>10%RH</i>   | <i>80%RH</i> | <i>Difference</i><br>(%) |
| <b>Thickness (nm)</b>           | 78           | 90           | 15                       | 37             | 47           | 27                       |
| <b>Refractive index @500 nm</b> | 1.58         | 1.52         | -3.8                     | 1.83           | 1.75         | -4.5                     |

For the modeling both the refractive index of the layers and the film thickness were fit as the humidity changed. We observed that the structure responded with a reduction of the thickness and a partial increase of refractive index of the layers due to the loss of water when RH decreased from 80% to 10%. This behavior induces a blue-shift of the interference peak and an increase of the reflectivity compared to standard condition. On the other hand, when RH is increased from 10% to 80%, water adsorption causes a swelling of the layers and a reduction of refractive index. The best fitting of experimental data obtained from simulations estimates that the increase of thickness is □15% for Rsilk and □27% for HRIsilk, while the decrease of refractive index is □2.5% and □4.5% for Rsilk and HRIsilk, respectively.

**Figure S5:** Plot of interference peak position and transmittance at 360 nm versus RH of the multilayer structure. Each point is an average of 5 measurements (error bars correspond to standard deviation). It is also reported the linear fit of the experimental points (red line) used to calculate the sensitivities reported in the main text.

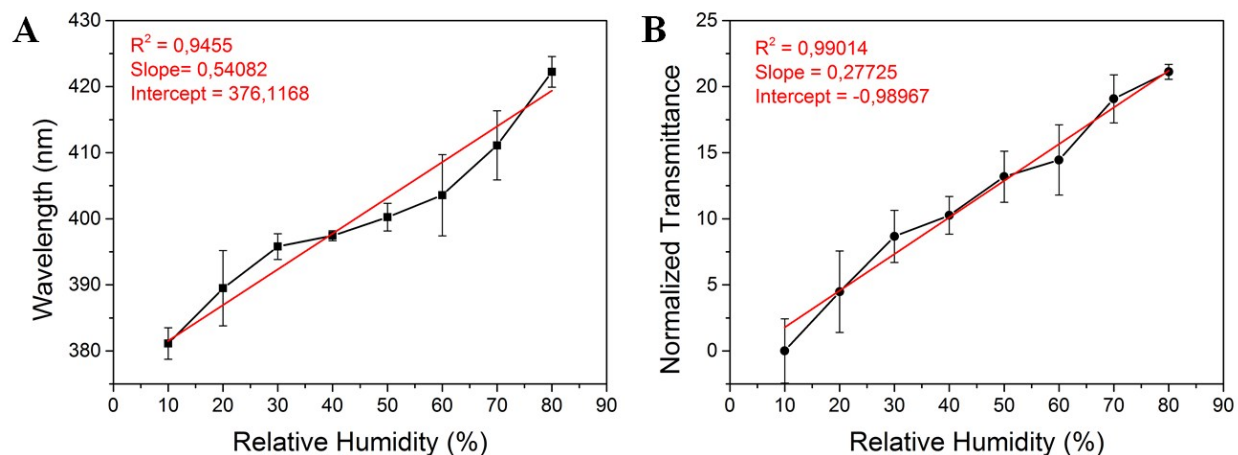

**Figure S6:** Cross-section SEM image of the multilayers structure deposited on fused quartz after several cycles of humidity treatment.

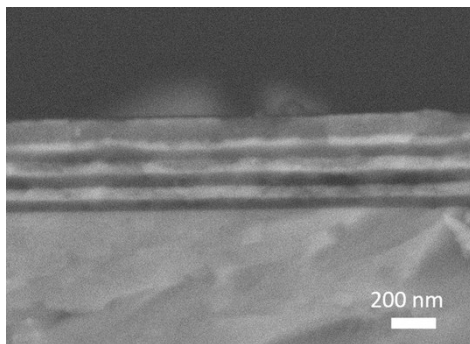

**Table S6:** Hysteresis values calculated from the curves reported in Figure 4D, E and F.

| <b>RH (%)</b> | <b>Hysteresis for Wavelength (%)</b> | <b>Hysteresis for Transmittance @ 360 nm (%)</b> | <b>Hysteresis for FWHM (%)</b> |
|---------------|--------------------------------------|--------------------------------------------------|--------------------------------|
| <b>10</b>     | 0.14                                 | 0.98                                             | 0.48                           |
| <b>20</b>     | 0.83                                 | 2.58                                             | 0.78                           |
| <b>30</b>     | 1.04                                 | 3.41                                             | 0.93                           |
| <b>40</b>     | 0.18                                 | 0.90                                             | 0.43                           |
| <b>50</b>     | 0.58                                 | 2.78                                             | 1.24                           |
| <b>60</b>     | 0.79                                 | -0.71                                            | 0.54                           |
| <b>70</b>     | 0.79                                 | 3.03                                             | 1.69                           |

**Video S1**
